# Supplementary material for: Involvement of G-quadruplex regions in mammalian replication origin activity
Source: PubMed Central journal article supplement (PMC6646384; doi:10.1038/s41467-019-11104-0), 2019-07-22
Supplement: 41467_2019_11104_MOESM1_ESM.pdf [file 41467_2019_11104_MOESM1_ESM.pdf]

# **Involvement of G-quadruplex regions in mammalian replication origin activity**

Prorok et al.

## **Supplementary Information**

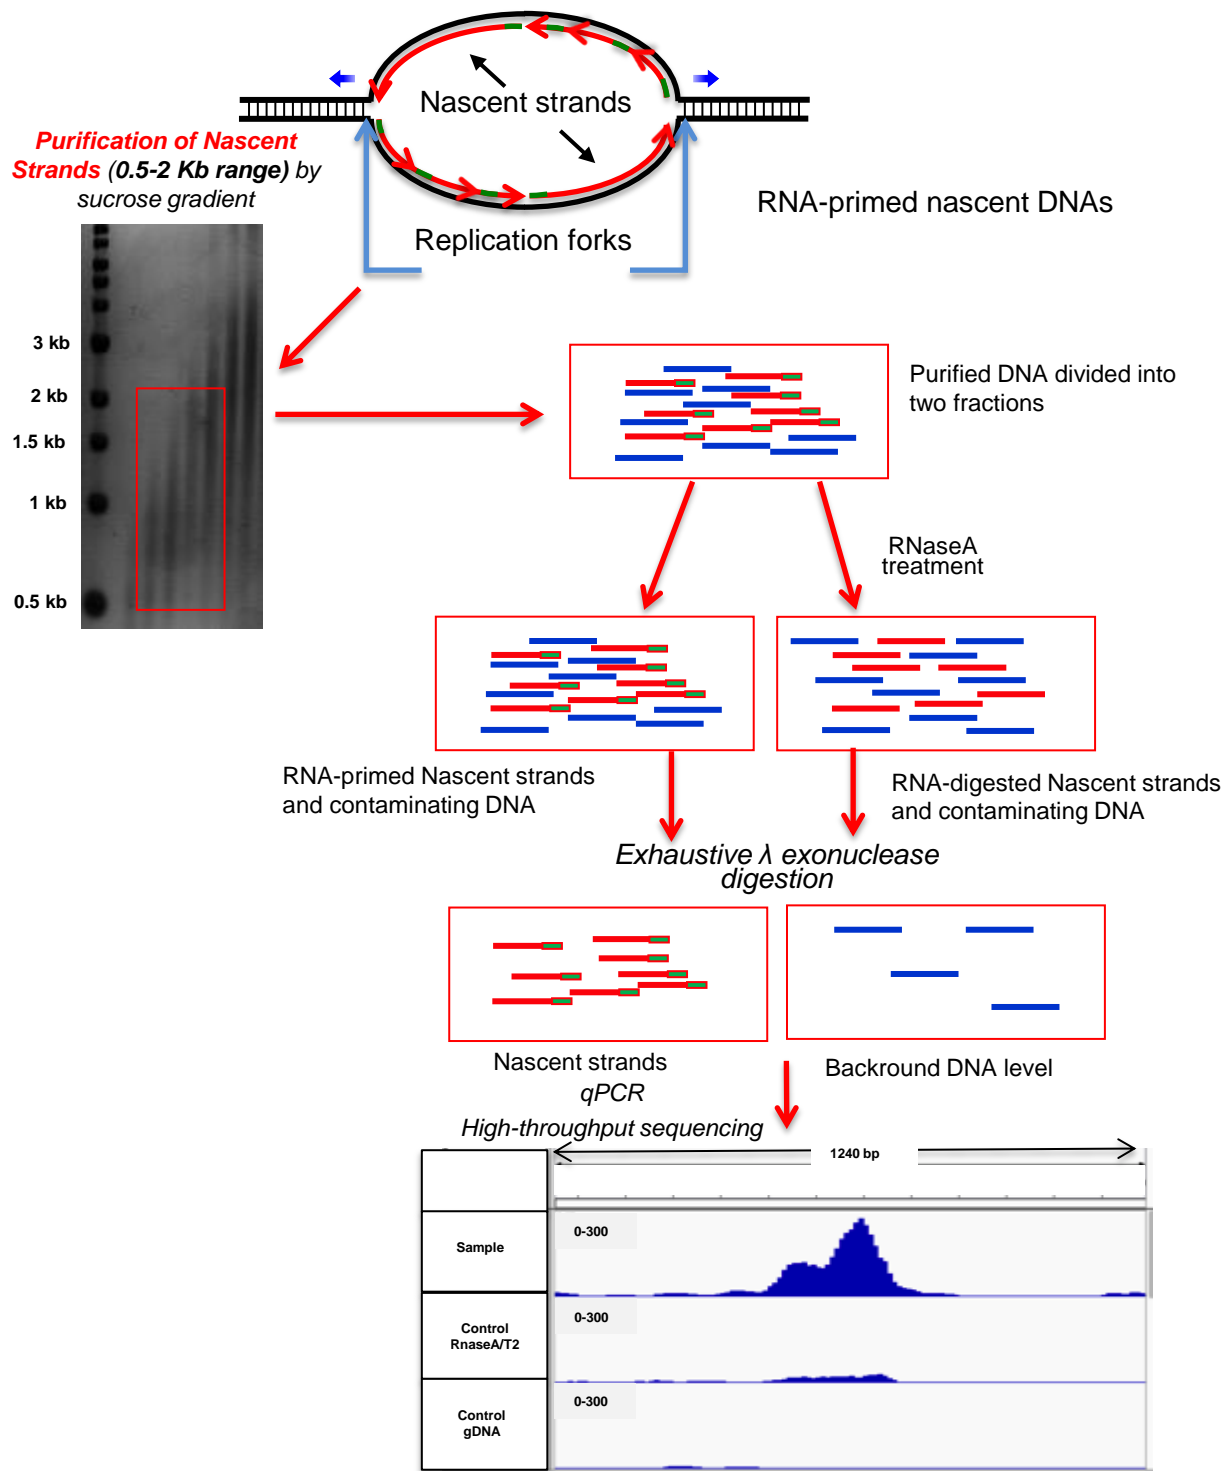

### Supplementary Figure 1. DNA replication origin mapping by nascent DNA strand isolation.

Short nascent DNA strands (0.5-2 kb) were isolated by genomic DNA purification and denaturation followed by nascent strand isolation on sucrose gradients. The nascent strand population was then digested with  $\lambda$  exonuclease, as described in Cayrou et al, Gen Res 2015 and Methods. The background level that might be left after  $\lambda$  exonuclease digestion was measured by treating half of the nascent DNA strand sample with RNase A/RNase T2 prior to a second round of  $\lambda$  exonuclease digestion. Purified nascent strands were then analyzed by qPCR or high-throughput whole-genome sequencing.

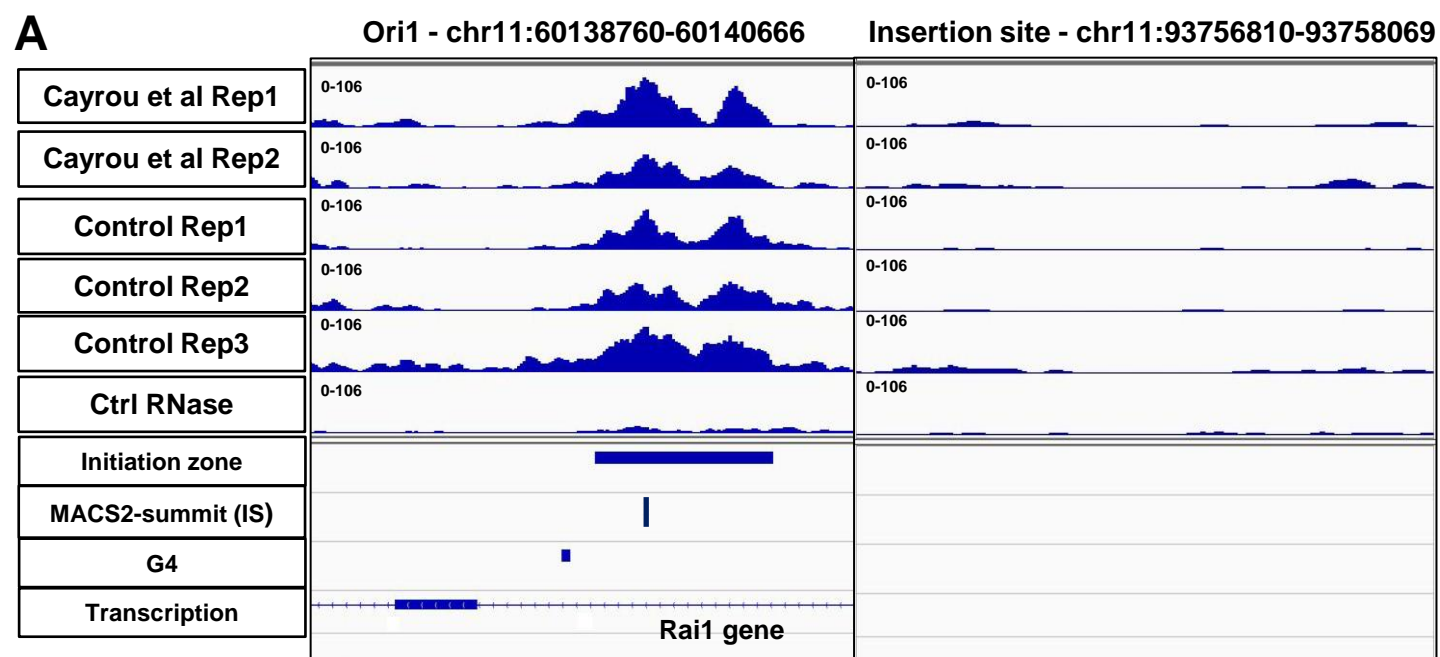

G4 ori1: GGG GGC GGG GAG GGA AGG GGG

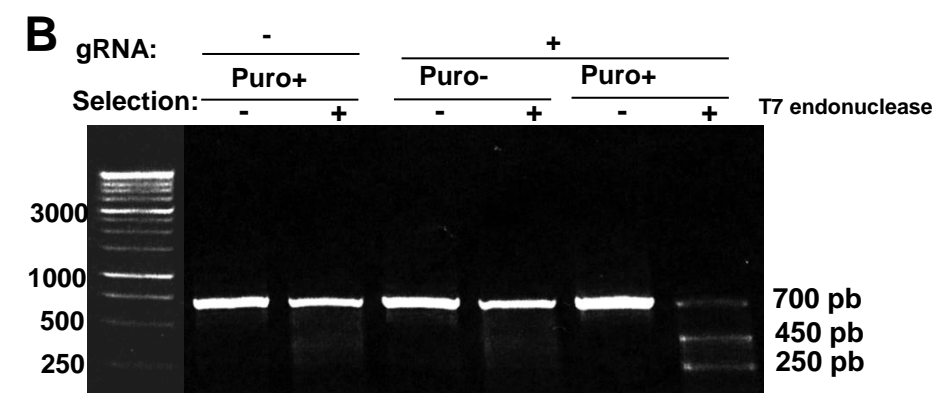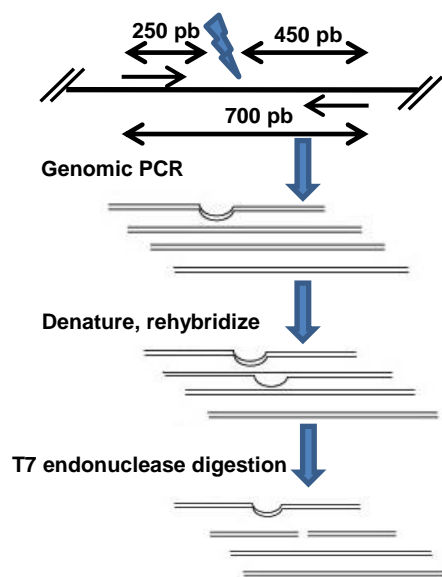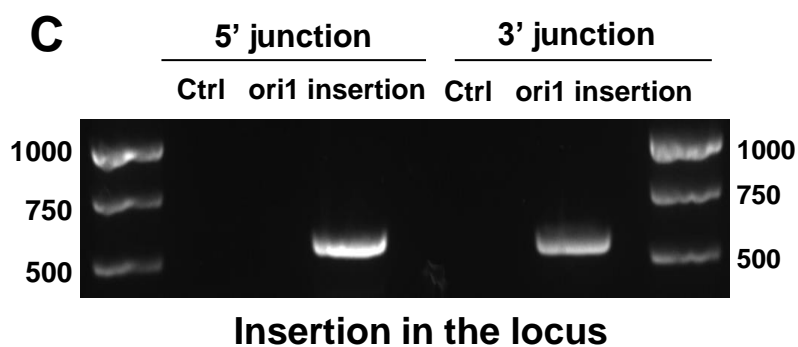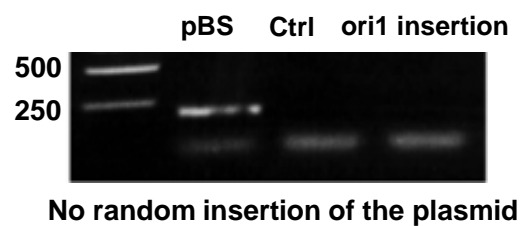

## **Supplementary Figure 2. Characterization of the ectopic replication origin.**

A) Replication profile of the origin site (Ori1) used for this study, in five entirely independent replicates of mouse ES cells (two from data in in Cayrou et al, Gen Res 2015 and three from the present analyses left panel). The selected origin on chromosome 11 is associated with a putative OGRE/G4-forming sequence, used in the presented study, that is located 240 bp upstream of the IS, defined by MACS2-summit, the point having the maximum reads number scored within the initiation zone. The ectopic Ori1 insertion site (right panel) is situated in a large origin-, transcription-, and OGRE/G4-free region.

B) Ori1 was inserted in the ectopic site by homologous recombination between the linear recombination template and the targeted site in the genome that was stimulated by a double strand break (DSB) induced by the Cas9 endonuclease expressed in transfected cells (right scheme). The specificity of DSB formation by Cas9 was checked using the Surveyor assay (left panel). The T7 endonuclease cuts mismatched regions in the dsDNA. A DSB was created at the targeted site only in the presence of a gRNA, and when puromycin was used for selection of transfected cells.

C) The correct ectopic insertion in the selected locus was confirmed by PCR detection of the newly created 5' and 3' junctions in the genome (left panel). The absence of any random insertion of the pBluescript plasmid bearing the insert was confirmed using primers specific for the plasmid (right panel).

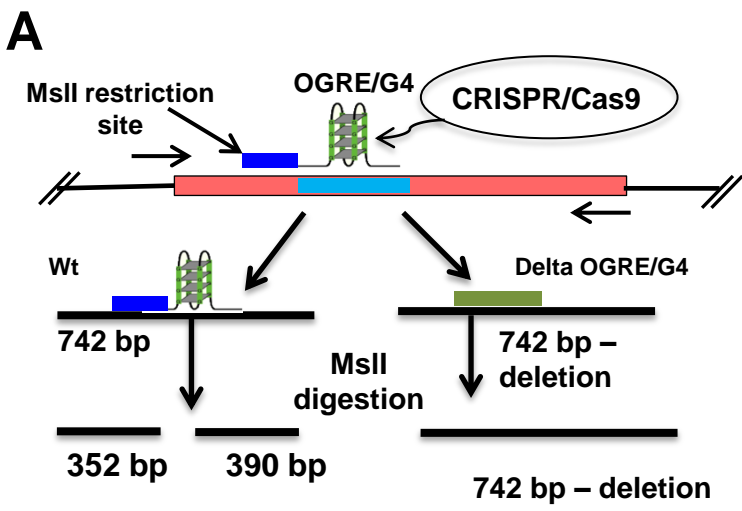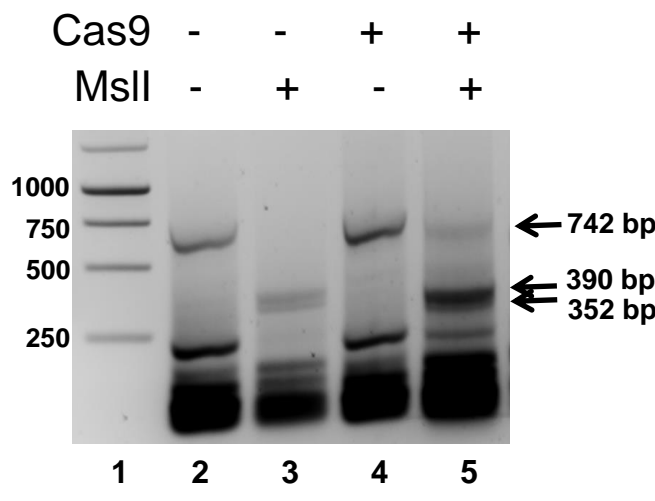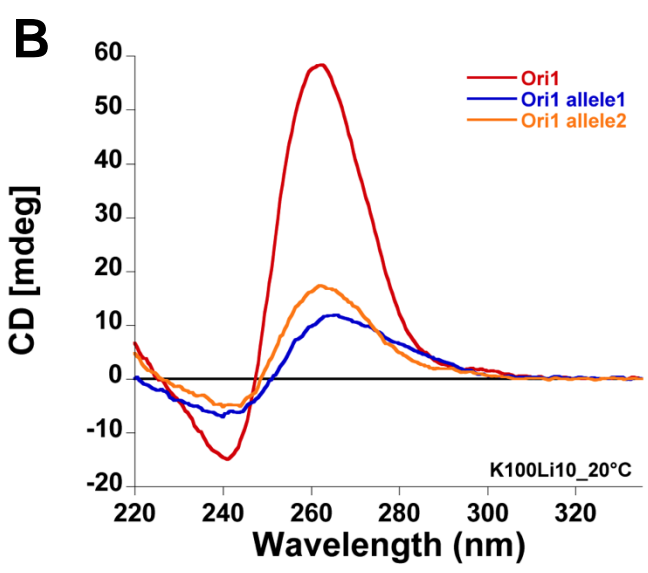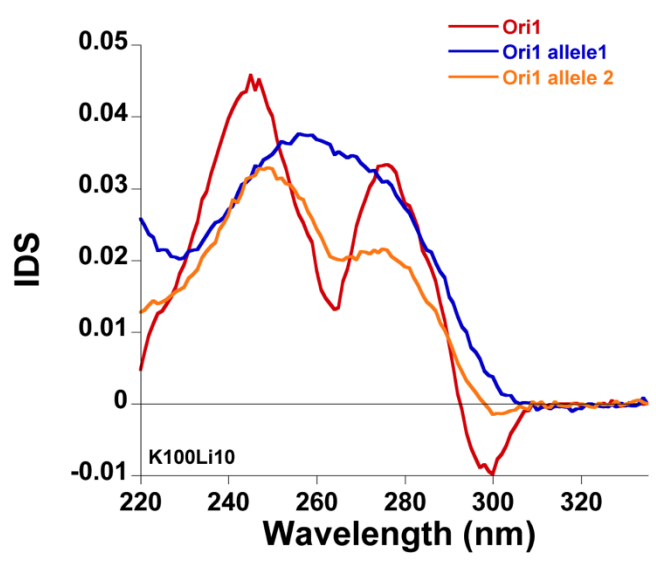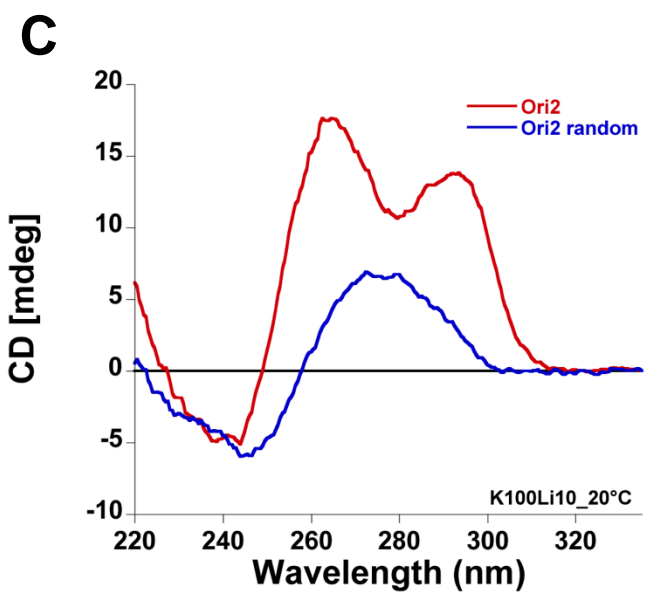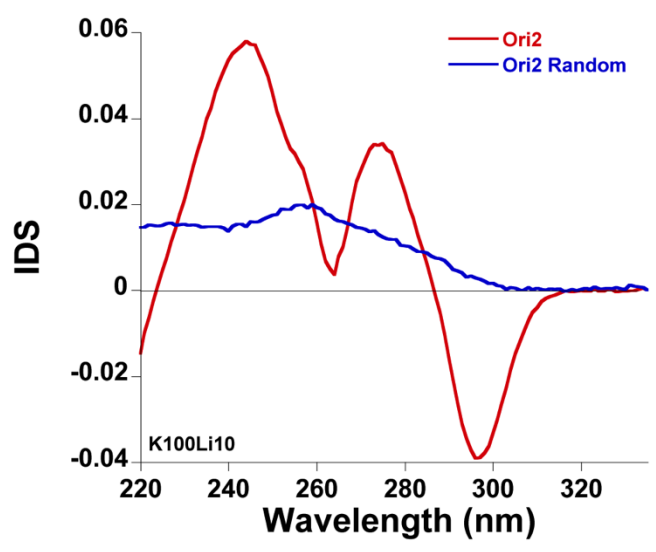

### **Supplementary Figure 3. Characterization of the G4 deletion from an endogenous replication origin.**

A) Schematic description of the OGRE/G4-containing Ori1 sequence deletion procedure (left panel). Sequence deletion was confirmed by digestion with MspI (a restriction enzyme that recognizes a palindromic sequence close to the OGRE/G4 motif). The DNA fragment with the targeted region (742 bp) was amplified by PCR and digested with MspI (right panel). As the deletion abolishes this site, a non-cleaved product is observed. In the wild type allele, incubation with MspI leads to the formation of two fragments (352 bp and 390 bp). The cell population harboring the deletion was cloned and in each clone, the presence of the deletion was confirmed by sequencing.

B) Circular dichroism spectra (CD, right panel) and Isothermal differential spectra (IDS, left panel) of Ori1 and mutated alleles obtained during CRISPR-Cas9 driven G4 deletion. Strong hallmarks of G4 formation in the wt sequence (Ori1), including a strong positive peak around 260 nm on CD spectrum, and a strong negative peak around 295 nm accompanied by two positive peaks around 240 and 273 nm on IDS spectrum are lost upon G4 deletion (Ori1 allele 1, Ori1 allele 2). The sequences were tested at 4  $\mu$ M strand concentration in 10 mM LiCaco pH 7,2 with 100 mM K<sup>+</sup>; CD spectra were recorded at 20°C after UV melting (in K<sup>+</sup>) between the 220–335 nm on a JASCO-1500 spectropolarimeter using 1 cm path length quartz cuvettes. IDS were obtained by taking the difference between the absorbance spectra from unfolded (without K<sup>+</sup>) and folded oligonucleotides (with K<sup>+</sup>). These spectra were respectively recorded before and after potassium cation addition at 25°C. They were recorded between the 220–335 nm.

C) Circular dichroism spectra (CD; right panel) and Isothermal differential spectra (IDS; left panel) of Ori2 and randomized Ori2. Hallmarks of G4 formation (a strong positive peak around 260 nm on CD spectrum, and a strong negative peak around 295 nm together with two positive peaks around 240 and 273 nm on IDS spectrum) present in the wt sequence (Ori2) are lost upon G4 randomisation (Ori2 Random).

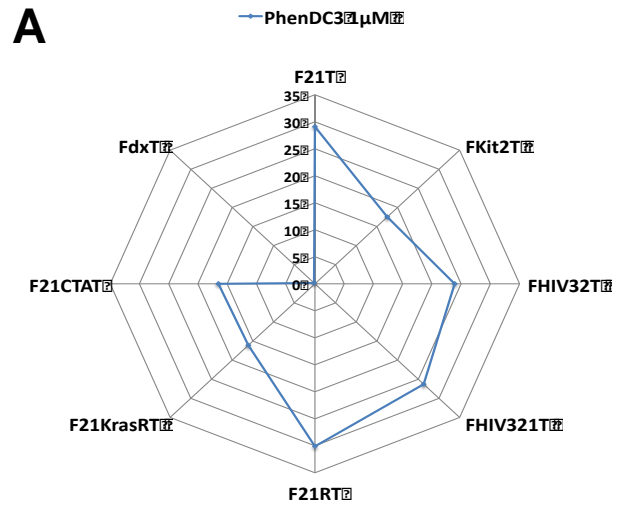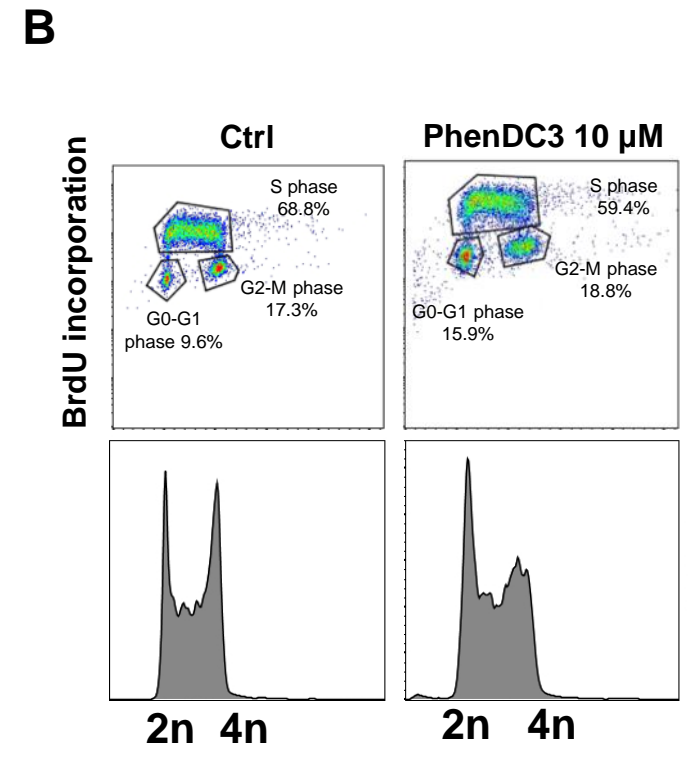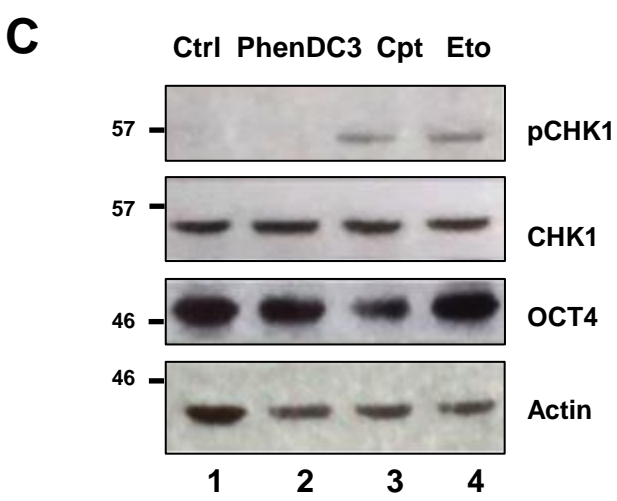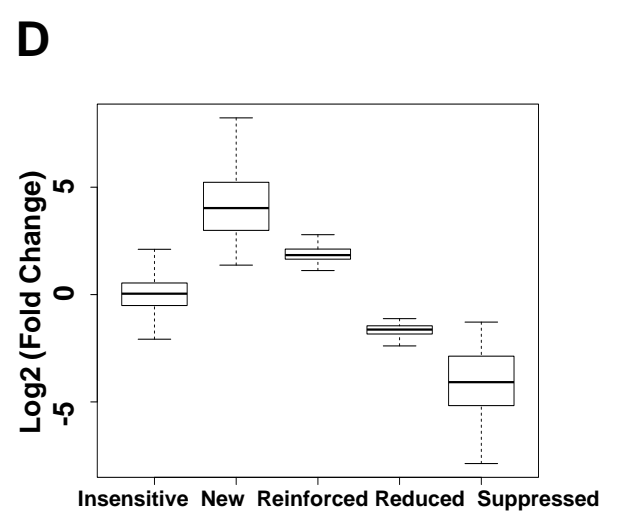

## **Supplementary Figure 4. PhenDC3 is an ubiquitous G4-forming sequence ligand.**

A) FRET melting assay: PhenDC3 stabilization of several G4-forming sequences labeled with Fam on the 5' and Tamra on the 3'. Each G4-forming sequence was pre-folded at 0.2  $\mu$ M in 10 mM LiCaco pH 7.2 supplemented with 10 mM KCl and 90 mM LiCl before adding 1  $\mu$ M PhenDC3. Stabilization (i.e., increase in  $T_{1/2}$ , expressed in  $^{\circ}$ C) is plotted for seven different quadruplexes and one control duplex (FdxT). The means were obtained in two independent experiments  $\pm$  SD. The tested sequences were: F21T (human telomeric DNA), F21RT (human telomeric RNA), Fkit2T (c-KIT2 human oncogene promoter), F21CTAT (mutant human telomeric DNA), FHiv32T (HIV PRO2 sequence), FHiv321T (HIV PRO1 sequence) and FdxT (intramolecular duplex). PRO1 and PRO2 are two different parts of the same HIV promoter region. The sequences are provided in Supplemental Table 3.

B) The cell cycle is not perturbed by incubation with PhenDC3, as indicated by the similar FACS profiles of control ES cells and cells incubated with 10  $\mu$ M PhenDC3.

C) G4 stabilization does not induce checkpoint activity, differently from camptothecin (Cpt) and etoposide (Eto), two known checkpoint-inducing agents. Expression of the pluripotency marker OCT4 did not vary after PhenDC3 addition (for antibody references see Supplementary Table 7).

D) The fold change in read number after incubation with PhenDC3 compared with control was used to define the different origin classes. No change in read number was observed for origins in the insensitive class. The highest positive fold change was observed in the new class, followed by the reinforced class. The most negative fold change was in the suppressed class.



# A Motif discovery search

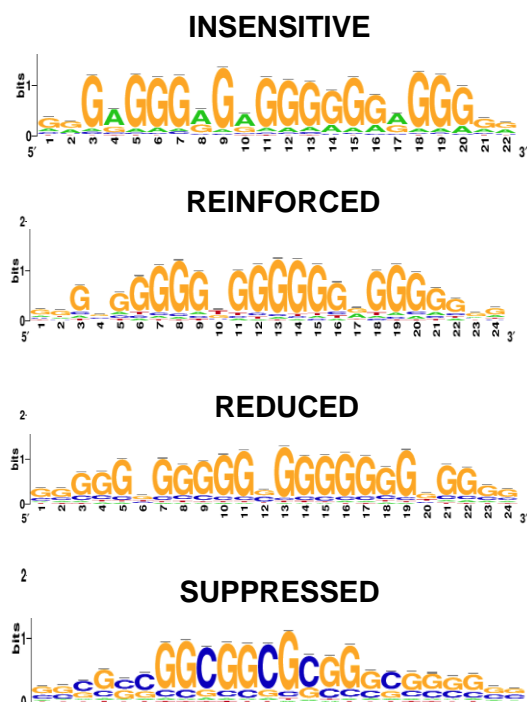

# B

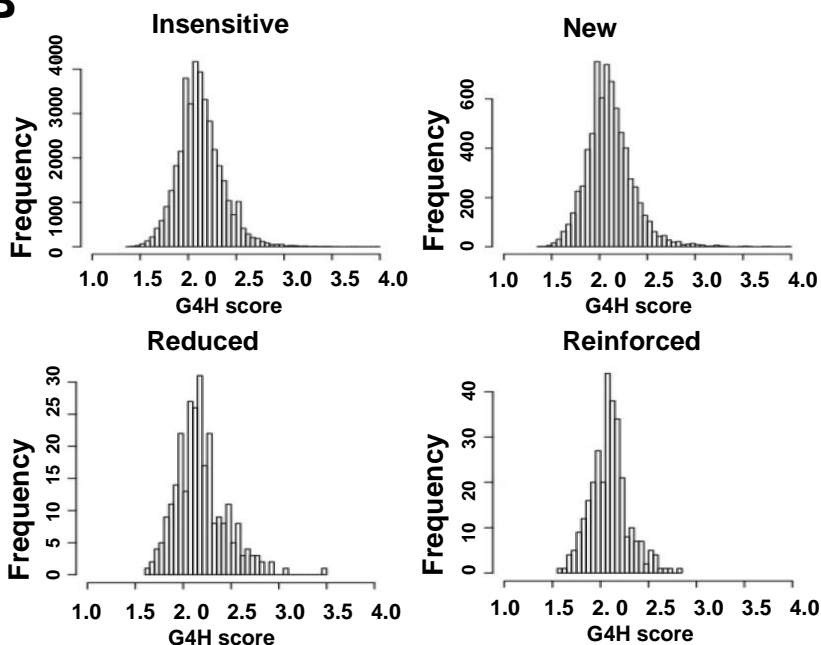

# C

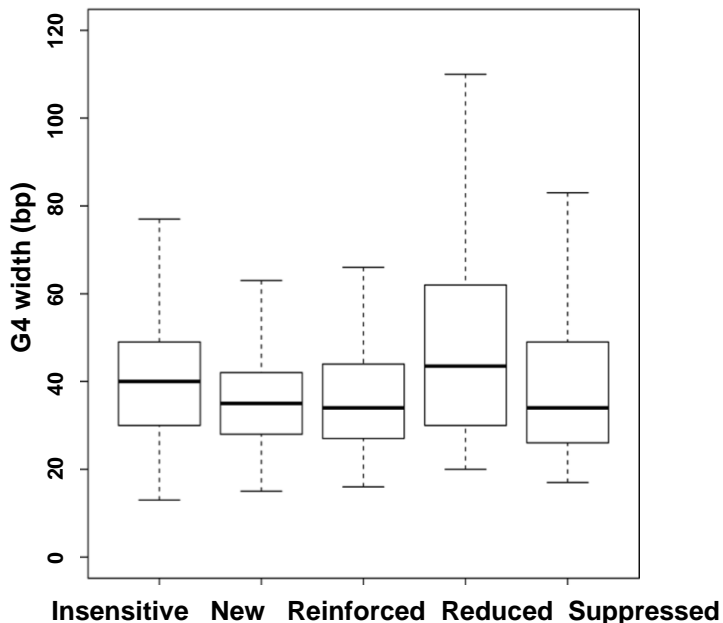

# D

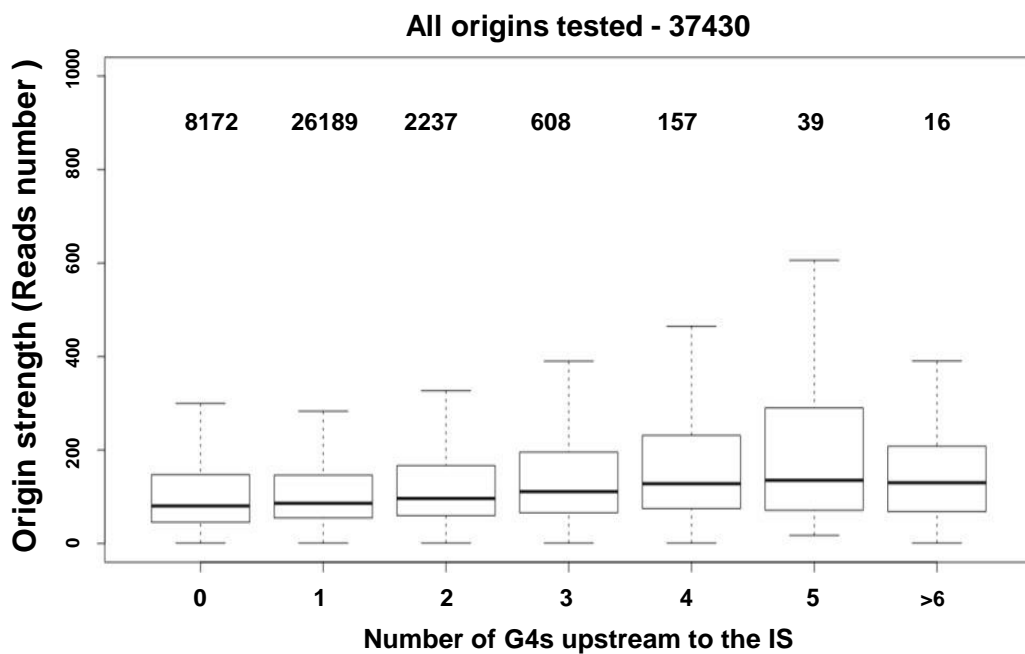

## **Supplementary Figure 5. OGRE/G4 features in the different origin classes after G4 stabilization by PhenDC3.**

A) De novo motif discovery for each origin class revealed the presence of an OGRE/G4 sequence, but for the suppressed class (analysis performed using the RSAT suite<sup>57</sup> and<sup>4</sup>. For the motif found in the new origin class see Figure 4A.

B) Distribution of the G4-Hunter (G4H) score is similar in all G4-associated origin classes (*reduced, reinforced, new, and insensitive*).

C) The length of the OGRE/G4 sequence does not significantly vary in the different origin classes.

D) Replication origin strength (measured in reads number) increases slightly with the number of OGRE/G4 associated with the tested origin.

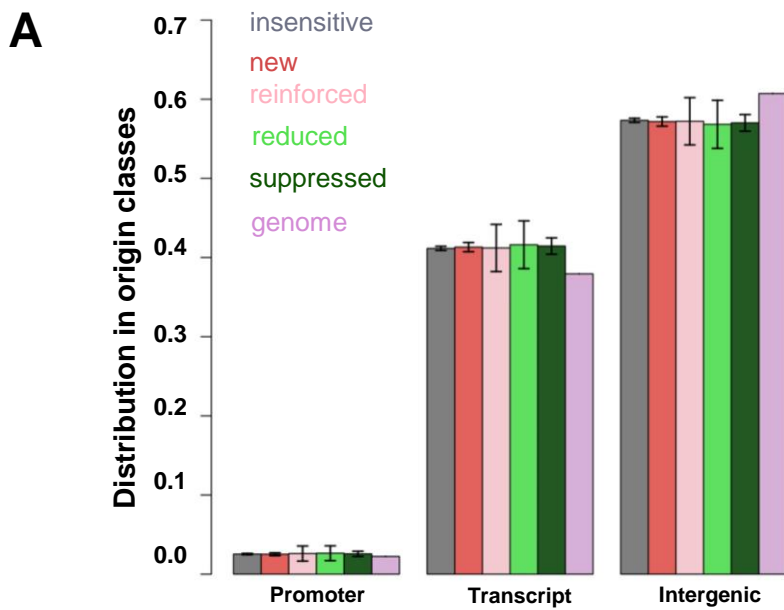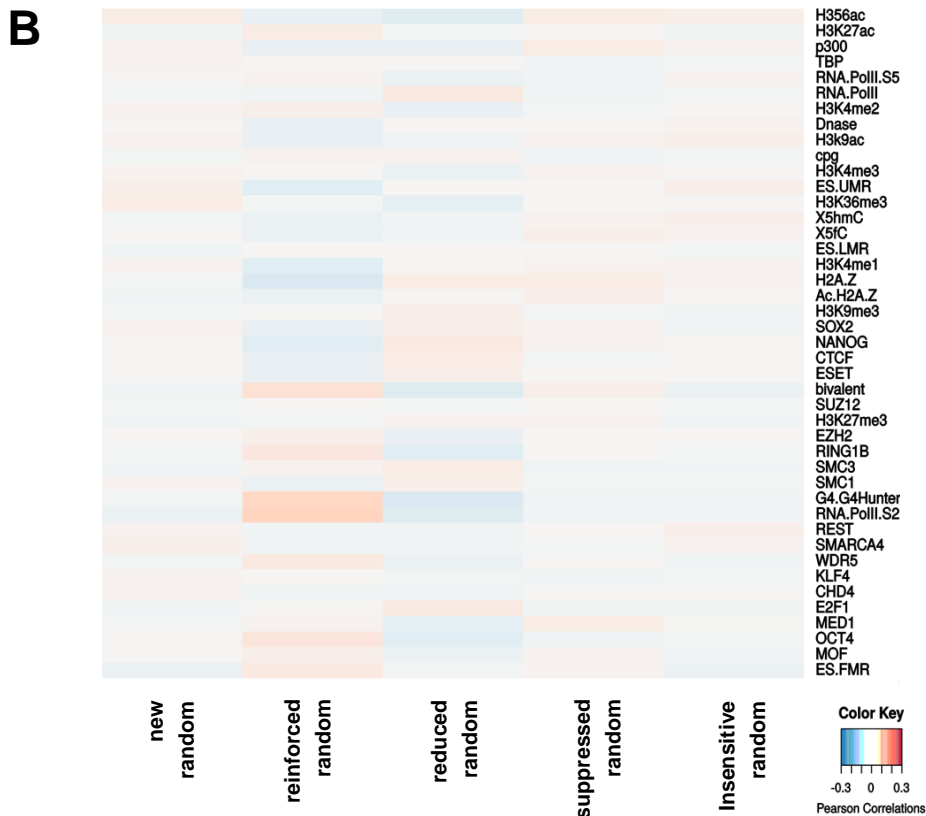

**Supplementary Figure 6. Association of randomized origins with transcription-related elements and transcription activity measured by RNA-seq.**

A) To be compared with Fig. 5B. Association of randomized origins with promoters, transcribed genes, and intergenic regions. Randomization was done by shuffling the IS coordinates, while keeping the chromosomal distribution of origins in each class. The value reported is the mean for 1000 shuffling events and the error bar represents the corresponding standard deviation.

B) Epigenetic mark distribution in randomized replication origins. To be compared with Figure 5C.

**A**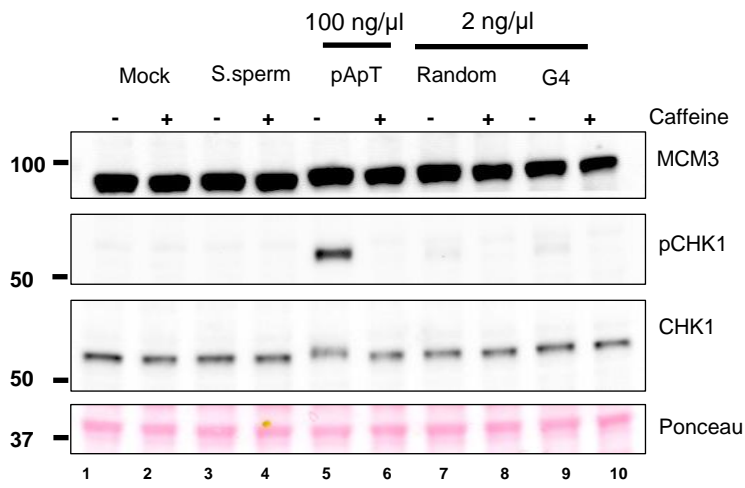**B**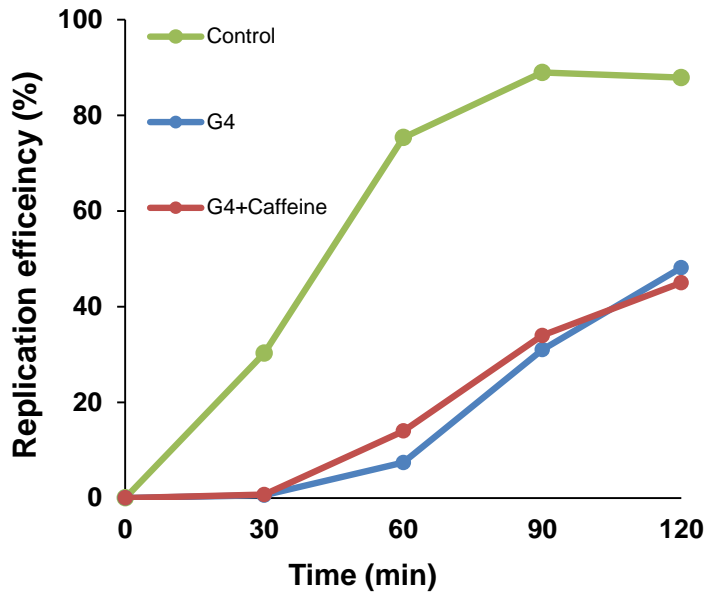**C**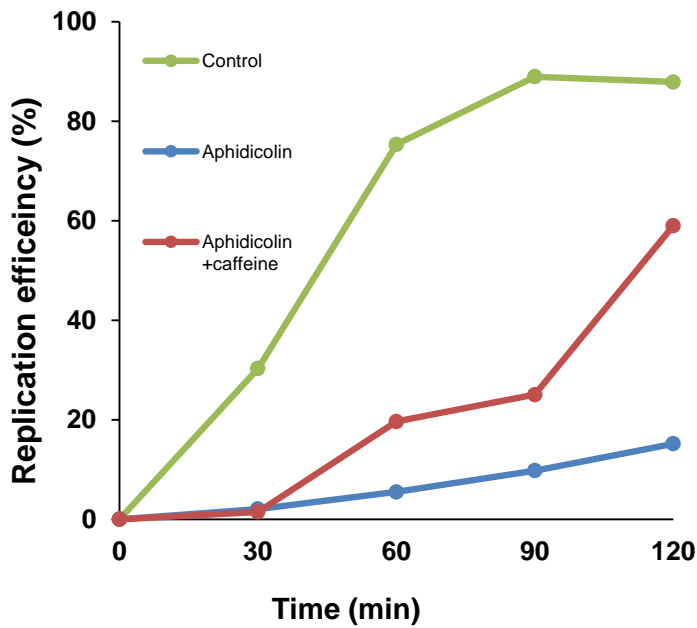

**Supplementary Figure 7. OGRE/G4 oligonucleotides do not induce a checkpoint response in *X. laevis* egg extracts.**

A) Competing oligonucleotides were incubated in *X. laevis* egg extracts at the same concentration as the ones used in the study. The checkpoint response was analyzed by western blotting using anti-phosphorylated CHK1 and pCHK1 antibodies. pApT oligonucleotides at high concentration were used as positive control. CHK1 phosphorylation was sensitive to the ATR/ATM kinase inhibitor caffeine.

B) Time-course analysis of replication efficiency after addition of sperm nuclei to LSEs pre-incubated with H<sub>2</sub>O (mock), G4-forming oligonucleotides (G4) or G4-oligonucleotides and Caffeine (G4 + caffeine). Caffeine overcomes phosphorylated CHK1-dependent inhibition of DNA replication, but does not restore replication of sperm nuclei in the presence of ds OGRE/G4 oligonucleotides.

C) Time-course analysis of replication efficiency after addition of sperm nuclei to LSEs pre-incubated with H<sub>2</sub>O (mock), Aphidicolin (Aphidicolin) or Aphidicolin and caffeine (Aphidicolin + caffeine). Aphidicolin induces checkpoint activation and inhibition of DNA replication that can be restored by addition of caffeine.

| Name      | Chr | Sequence                                                | Relation to transcription | Timing | G4H score | G4 formation |
|-----------|-----|---------------------------------------------------------|---------------------------|--------|-----------|--------------|
| Ori1      | 11  | GGGGCGGGGAGGGAAGGGGG                                    | 1st Intron                | Early  | 3.05      | Yes          |
| Ori2      | 11  | GGGGGATGGGGTTGGAATGGGGCGG<br>GG                         | 1st Intron                | Early  | 2.52      | Yes          |
| Ori ins A | 19  | TGGTGGGGGTGGGGGTAGGGGTGGG<br>GGGAGA                     | 1st Intron                | Early  | 2.93      | Yes          |
| Ori ins B | 16  | AGGGGGATGGGAGGGGGAATGGGGG<br>C                          | Intron                    | Late   | 2.88      | Yes          |
| Ori ins C | 13  | AGGGGGAGTGGGAGTGTAGGGGATCG<br>GGGGGGGGGGTGTGAGTATGGGGGA | Intergenic                | Late   | 2.33      | Yes          |
| Ori ins D | 1   | AGGGAGAGGGAGGATGGGATAGGGG<br>GT                         | Intergenic                | Late   | 2.21      | Yes          |
| Ori ins E | 10  | TGGTAGGGGTGGGGTGGGGGCTGGG<br>GC                         | Intergenic                | Early  | 2.84      | Yes          |
| Ori ins F | 3   | CAAAGGGCAGGCGGGGGTGGGGGGG<br>TGGGGGTGGGGGCTCATGCAG      | Intron                    | Early  | 2.51      | Yes          |
| Ori ins G | 15  | AGGGGGAGTGGGTGGGTAGGGGATTG<br>GGGGGGT                   | Intergenic                | Early  | 2.68      | Yes          |
| Ori new A | 5   | AGGGTGGGTGGGTGGGTGGGTGGGT<br>GGGGC                      | Intergenic                | Early  | 2.50      | Yes          |
| Ori new B | 15  | TGGCGGGGCGGGGGGGGGTGCGGG<br>GGAGGT                      | Intron                    | Early  | 2.83      | Yes          |
| Ori new C | 4   | AGGAGGGAGGGAGGGAGGGAGGGA                                | Intergenic                | Late   | 2.23      | Yes          |
| Ori new D | 13  | TGGGGGTGGGTGGGTATGGGGGA                                 | Intron                    | Late   | 2.76      | Yes          |
| Ori new E | 5   | CGGGGGGATGGGGGTCCTCAGGG<br>GGCAGGGA                     | Intergenic                | Early  | 2.42      | Yes          |
| Ori new F | 1   | CGGTGTGGGGTGGGGTGGGGTGGGG<br>GAGA                       | Intergenic                | Early  | 2.74      | Yes          |
| Ori new G | 3   | TGGGCTGGGGGCTGGAGGGGGGGAT<br>ACTGGGA                    | Intergenic                | Early  | 2.23      | Yes          |
| Ori new H | 10  | AGGGGGGACTGGGAGAGGGGAGAAG<br>GA                         | Intron                    | Early  | 2.38      | Yes          |
| Ori new I | 17  | TGGCATGGGGGTCCGGGGGAGGGT                                | Intron                    | Early  | 2.18      | Yes          |
| 22ag      |     | AGGGTTAGGTTAGGGTTAGGG                                   |                           |        | 1.48      | NA           |
| 1XAV      |     | TGAGGGTGGGTAGGGTGGGTAA                                  |                           |        | 1.68      | NA           |
| ds26      |     | CAATCGGATCGATCCGATTG                                    |                           |        | 0         | No           |
| dT30      |     | TTTTTTTTTTTTTTTTTTTTTTTTTTTTT                           |                           |        | 0         | No           |

### **Supplementary Table 1: OGRE/G4 sequences associated with origins and tested in this study.**

Ori1 and Ori2 were used for genetic experiments in mouse cells and episomal vector replication. Putative G4-forming sequences found in the vicinity of insensitive (ins) and new (new) origins after PhenDC3 treatment are also indicated. The potential of each sequence to form a G4 was predicted by the G4-Hunter software (G4H score) and by testing them using two spectroscopic techniques (thermal difference spectrum and circular dichroism).

| Oligo name               | Sequence                       |
|--------------------------|--------------------------------|
| gRNA insertion F         | ACACCGATTTCTCAGTGTTAATTTTG     |
| gRNA insertion R         | AAAACAAAATTAACACTGAGAAATCG     |
| SURV_C_S697              | TCCATGGGGATCTCCTGAGG           |
| SURV_C_AS697             | CAAAAACACCAGAAGGAACACAG        |
| Ori1 C1                  | CGC AGC AGT TAG GTT GTG CTG    |
| C3 AS1                   | GAA AGG TTC TGA TTG GCT GGG    |
| Ori1 G1                  | ATG CAG CCC ACC CTT TCA ATT C  |
| pBS1529S                 | CAA CCC GGT AAG ACA CGA CT     |
| pBS1726AS                | CCG GAT CAA GAG CTA CCA AC     |
| Bcgd1 F                  | AGA AGC CCT TGA CCA TGA GA     |
| Bcgd1 R                  | AGG TGG CAG AAT GCT AAT GC     |
| Bcgd2 F                  | CGG CAT GAT TTG GAC GTA A      |
| Bcgd2 R                  | AGCAACAGGCAAGGTATTCAACA        |
| Ori1 primer 1 F          | GAATTGAAAGGGTGGGCTGC           |
| Ori1 primer 1 R          | TTGGACCTTTGAGGCTGGAC           |
| Ori1 primer 2 F          | CTT GTT TGT GAC TGG GCT GA     |
| Ori1 primer 2 R          | CAC TGC TTG TTC GCA CCT TA     |
| Ori1 primer 3 F          | GGACTGAGTGAT GCA GTGGT         |
| Ori1 primer 3 R          | ACA GGC GCA ATG TCCATA CT      |
| Ori2 F                   | GGG CAC TTC AAA GCA ATG TT     |
| Ori2 R                   | CCG TTT CTG GTG TTG AGG AT     |
| 5'junction F             | CTG AAG ATT CTC AAG AGC GGC    |
| 5'junction R             | CGC GAT CCT TGT TGG AGT TG     |
| 3'junction F             | TGC TAG CCA GCC CTT TCT AA     |
| 3'junction R             | TTT CAG AGG GTC CTC AAA GC     |
| gRNA Ori1 delG4 1F       | ACACCGCCTAAAGACCGAGTGGGGGG     |
| gRNA Ori1 delG4 1R       | AAAACCCCCACTCGGTCTTTAGGCG      |
| gRNA Ori1 delG4 2F       | ACACCGGAACCTCGCAGCAGTGACCG     |
| gRNA Ori1 delG4 2R       | AAAACGGTCACTGCTGCGAGGTTCCG     |
| Ori1 742 F               | ACAATCGCACACAAACACCAC          |
| Ori1 742 R               | AGCGCTCACACGATTCCTT            |
| Ori1 742 F               | ACAATCGCACACAAACACCAC          |
| Ori1 742 R               | AGCGCTCACACGATTCCTT            |
| Rai1c4ex3F (Rai1 a)      | AGG AAC ACT GGG TCC ATG AG     |
| Rai1c4ex4R (Rai1 a)      | GCA CAT GGG TAG TGG TAG GT     |
| Rai1qPCR130F (Rai1 b)    | ATG CAG TCT TTT CGA GAA AGG TG |
| Rai1qPCR130R (Rai1 b)    | GCT GCC GAT CAC AGC TTA G      |
| Gapdh ex4-F              | GTGCTGAGTATGTCGTGGAG           |
| Gapdh ex5-R              | GAGATGATGACCCTTTTGGCTC         |
| b-actin-ex2-fw (actin 1) | GAACCCTAAGGCCAACCGTG           |
| b-actin-ex3-rv (actin 1) | GGAGTCCATCACAATGCCTG           |
| b-actinRT F1 (actin 2)   | CGCCACCAGTTCGCCATGGA           |
| b-actinRT R1 (actin 2)   | TACAGCCCGGGGAGCATCGT           |
| b-actinRT F1 (actin 2)   | CGCCACCAGTTCGCCATGGA           |
| b-actinRT R1 (actin 2)   | TACAGCCCGGGGAGCATCGT           |

**Supplementary Table 2. Sequences of the oligonucleotides used in the study.**

| Name      | G4H score<br>(sequence length [nt]) | 5'Fam-Sequence-Tamra 3'                              | Structure       | Delta T <sub>m</sub> (°C)<br>PhenDC3<br>(1 μM) |
|-----------|-------------------------------------|------------------------------------------------------|-----------------|------------------------------------------------|
| F21T      | 1.71 (21)                           | <b>GGG TTA GGG TTA GGG TTA GGG</b>                   | G4 polymorphic  | 29.1                                           |
| FKit2T    | 2.1 (22)                            | <b>GGG C GGG CGCGA GGG AG GGG</b>                    | G4 polymorphic  | 17.5                                           |
| FHIV32T   | 1.21 (24)                           | CA <b>GGG A GG CGT GG CCT GGG C GGG A</b>            | G4 Hybrid       | 23.9                                           |
| FHIV321T  | 1.19 (21)                           | TT <b>GG CCT GGG C GGG ACT GGG A</b>                 | G4 Antiparallel | 26.3                                           |
| F21RT     | 1.71 (21)                           | <b>GGG UUA GGG UUA GGG UUA GGG</b>                   | G4 Antiparallel | 30.1                                           |
| F21KrasRT | 1.52 (21)                           | A <b>GGG C GG TGT GGG AAGA GGG A</b>                 | G4 Antiparallel | 16.1                                           |
| F21CTAT   | 1.57 (21)                           | <b>GGG CTA GGG CTA GGG CTA GGG</b>                   | G4 Antiparallel | 16.5                                           |
| FdxT      | 0 (21)                              | TAT AGC TAT A-hexa ethylene glycol -T ATA<br>GCT ATA | dsDNA. Hairpin  | 0.2                                            |

### Supplementary Table 3. Sequences used for the FRET melting assay.

FRET melting assay measures the affinity of G4 stabilizers for the tested sequences that are predicted to form G4 structures. The column “Structure” indicates the structure adopted by the corresponding oligonucleotide, which is either a hairpin duplex (for FdxT) or a quadruplex (G4) with different possible topologies: parallel, antiparallel, hybrid, or a mixture (« polymorphic »). As shown in the rightmost column (delta T<sub>m</sub>) PhenDC3 stabilizes all G4 structures (delta T<sub>m</sub> > +16°C for all G4) and can therefore be considered as a G4 ligand having no strong preference for one given conformation. It is clearly specific for G4 over duplexes though, as the delta T<sub>m</sub> for FdxT is close to zero.



| (+/- 500bp from center) | total | QP+   | QP-   | G4H+  | G4H-  | %QP  | %G4H |
|-------------------------|-------|-------|-------|-------|-------|------|------|
| <b>insensitive</b>      | 34593 | 23512 | 11081 | 25605 | 8988  | 68.0 | 74.0 |
| <b>new</b>              | 6972  | 5171  | 1801  | 5284  | 1688  | 74.2 | 75.8 |
| <b>reinforced</b>       | 279   | 202   | 77    | 192   | 87    | 72.4 | 68.8 |
| <b>reduced</b>          | 291   | 172   | 119   | 176   | 115   | 59.1 | 60.5 |
| <b>suppressed</b>       | 2264  | 436   | 1828  | 369   | 1895  | 19.3 | 16.3 |
| <b>total</b>            | 44399 | 29493 | 14906 | 31626 | 12773 | 66.4 | 71.2 |
| <b>all control</b>      | 37427 | 24322 | 13105 | 26342 | 11085 | 65.0 | 70.4 |
| <b>all PhenDC3</b>      | 42135 | 29057 | 13078 | 31257 | 10878 | 69.0 | 74.2 |
| <b>oris changed</b>     | 9806  | 5981  | 3825  | 6021  | 3785  | 61.0 | 61.4 |

**Supplementary Table 4: Origin association with OGRE/G4 according to G4-Hunter (G4H) and Quadparser (QP).**

The number of origins found in each class, and their classification in OGRE/G4-associated (+) and -independent (-) origins, according to the QP and G4H putative G4 maps. Origins were considered to be associated with an OGRE/G4 motif when they contained at least one OGRE/G4 sequence upstream the IS at a maximal distance of 500 bp. There was no significant change in OGRE/G4-association between G4-predicting tools.

| Mark/factor     | Year | PMID              | GEO_GSE              |
|-----------------|------|-------------------|----------------------|
| H3K56ac         | 2013 | 23798425          | GSE47387_GSM1148636  |
| H3K27ac         | 2012 | encodeproject.org | GSE31039_GSM1000126  |
| p300            | 2013 | 23602153          | GSE41545_GSM1019072  |
| TBP             | 2010 | 20720539          | GSE22562             |
| RNA PolII S5P   | 2010 | 20434984          | GSE20530_GSM515662   |
| RNA PolII       | 2010 | 20434984          | GSE20530_GSM515667   |
| H3K4me2         | 2013 | 23028048          | GSE18515_GSM461266   |
| DHS (Dnase)     | 2013 | encodeproject.org | GSE37074_GSM1014154  |
| H3K9ac          | 2012 | 22920947          | GSE31284_GSM775313   |
| CpGi            | 2015 | 25428374          |                      |
| H3K4me3         | 2013 | 23352811          | GSE38164_GSM936113   |
| ES UMR          | 2013 | 22170606          | GSE30202             |
| H3K36me3        | 2012 | encodeproject.org | GSE31039_GSM1000125  |
| 5hmC            | 2013 | 23602153          | GSE41545_GSM857136   |
| 5fC             | 2013 | 23602153          | GSE41545_GSM986287   |
| ES LMR          | 2013 | 22170606          | GSE30202             |
| H3K4me1         | 2012 | encodeproject.org | GSE31039_GSM1000121  |
| H2A.Z           | 2013 | 23260488          | GSE34483_GSM849928   |
| Ac H2A.Z        | 2013 | 23260488          | GSE34483_GSM849929   |
| H3K9me3         | 2012 | encodeproject.org | GSE31039_GSM1000147  |
| SOX2            | 2008 | 18555785          | GSE11431_GSM288347   |
| Nanog           | 2008 | 18555785          | GSE11431_GSM288345   |
| CTCF            | 2008 | 18555785          | GSE11431_GSM288351   |
| ESET            | 2009 | 19884257          | GSE17642_GSM440256   |
| bivalent_domain | 2007 | 17603471          | GSE12241             |
| SUZ12           | 2012 | 22438827          | GSE28325_GSM700554   |
| H3K27me3        | 2013 | 23104054          | GSE41589_GSM1019772  |
| EZH2            | 2009 | 20064375          | GSE18776_GSM480161   |
| RNF2(ring1B)    | 2012 | 22325148          | GSE23716_GSM585229   |
| SMC3            | 2010 | 20720539          | GSE22562_GSM560343   |
| SMC1            | 2010 | 20720539          | GSE22562_GSM560341   |
| G4              | 2016 | 26792894          | G4Hunter             |
| RNA PolII S2P   | 2010 | 20434984          | GSE20530_GSM515663   |
| REST            | 2012 | 22396653          | GSE48122_GSM1169011  |
| SMARC4          | 2009 | 19279218          | GSE14344_GSM359413   |
| WDR5            | 2011 | 21477851          | GSE22934_GSM566279   |
| KLF4            | 2008 | 18555785          | GSE11431_GSM288354   |
| CHD4            | 2012 | 22297846          | GSE27841_GSM687284   |
| E2F1            | 2008 | 18555785          | GSE11431_GSM288349   |
| MED1            | 2010 | 20720539          | GSE22562_GSM560347   |
| OCT4            | 2012 | 22608532          | GSE36388_GSM892276   |
| MOF             | 2012 | 22862943          | GSE37268_GSM915227/8 |
| ES FMR          | 2013 | 22170606          | GSE30202             |

**Supplementary Table 5. Reference data for the epigenetic marks.**

| Name                                | GC content | Sequence                                                                                     | Reverse complement                                                                               |
|-------------------------------------|------------|----------------------------------------------------------------------------------------------|--------------------------------------------------------------------------------------------------|
| OGRE/G4-containing oligonucleotide, | 71.3 %     | CGAGGTTCTAGGCGCCTAAAGAC<br>CGAGTGGGGCGGGGAGGGAAG<br>GGGGTGCTGTGCGTGCGCGCGC<br>GTGCCAAAGC     | GCTTTGGCACGCGCGCG<br>CGCACGCACAGCACCCC<br>CTTCCCTCCCCGCCCA<br>CTCGGTCTTAGGCGCCT<br>AGGAACCTCG    |
| Random oligonucleotide 1            | 47.5 %     | TTCTGCGTTACTTTAACCGCGACGG<br>ACGCCTGAGCTTTGACCTAATTCGC<br>AGGGTGGGATATTGCGTTTTAATT<br>GAGGT  | ACCTCAATTA AAAACGC<br>AATATCCACCTGCGA<br>ATTAGGTCAAAGCTCAG<br>GCGTCCGTCGCGGTAA<br>AGTAACGCAGAA   |
| Random oligonucleotide 2            | 48.8 %     | GCAAGTCAGCAGCATTACCACTGT<br>CTCCTGTTGTCAGAATAACCGGACA<br>GCCTGGGTTTCAAAGTGGAGCTGT<br>GTATGCT | AGCATACACAGCTCCAC<br>TTTGAAACCCAGGCTGT<br>CCGGTTATTCTGACAACA<br>GGAGACAGTGGTAATGC<br>TGCTGACTTGC |
| AT-rich (70%) Oligonucleotide       | 30 %       | TGCTAAATCAATTGTTATCGGTTCT<br>TAAACAATCGCTCACAAAACGGA<br>TTAAACAAAGAAAAGCAAATATTG<br>TCAATGA  | TCATTGACAATTTTGCT<br>TTTCTTTGTTAATCCGTT<br>TTGTGAGCGATTGTTTTA<br>AGAACCGATAACAATTG<br>ATTTAGC    |

**Supplementary Table 6. G-rich sequences tested in the oligonucleotide competition assays in *X. laevis* egg extracts. Random and AT-rich oligonucleotides were designed (<http://mkwak.org/oligorand/>):**

| Antibody                               | Company          | Reference                         | Dilution |
|----------------------------------------|------------------|-----------------------------------|----------|
| Study in mouse cells                   |                  |                                   |          |
| Anti-OCT4                              | Abcam            | ab19857                           | 1/500    |
| Anti-pCHK1                             | Cell Signaling   | 2341T                             | 1/250    |
| Anti-CHK1                              | Santa Cruz       | sc-8408                           | 1/500    |
| Anti-Actin                             | Sigma            | A4700                             | 1/500    |
| secondary HRP-linked Anti-Mouse IgG    | GE Healthcare    | NA931V                            | 1/4000   |
| secondary HRP-linked Anti-Rabbit IgG   | GE Healthcare    | NA934V                            | 1/4000   |
| Study in <i>X. laevis</i> egg extracts |                  |                                   |          |
| Anti-ELYS                              | laboratory stock | PMID: 17825564,<br>PMID: 17235358 | 1/500    |
| Anti-CDC45                             | laboratory stock | PMID: 12384698                    | 1/1000   |
| Anti-PCNA                              | Sigma            | P8825                             | 1/2500   |
| Anti-H3                                | Abcam            | Ab1791                            | 1/2000   |
| Anti-MCM4                              | laboratory stock | PMID: 12384698                    | 1/1000   |
| Anti-CDC6                              | laboratory stock | PMID: 12384698                    | 1/500    |
| Anti-ORC5                              | laboratory stock | PMID: 31160578                    | 1/1000   |
| Anti-H2B                               | Abcam            | ab1790                            | 1/2000   |
| Anti-MCM3                              | laboratory stock | PMID: 15707891                    | 1/2000   |
| Anti-RPA34                             | laboratory stock | PMID: 15456845                    | 1/500    |
| Anti-CHK1                              | Santa Cruz       | sc-8404                           | 1/250    |
| Anti-pCHK1                             | Cell Signaling   | 2341S                             | 1/500    |

**Supplementary Table 7. References of antibodies used in this study.**
